# Supplementary material
Source: PubMed Central journal article supplement (PMC3386055)
Supplement: 1120473109_pnas.201120473SI.pdf [file 1120473109_pnas.201120473SI.pdf]

# Supporting Information

Chau et al. 10.1073/pnas.1120473109

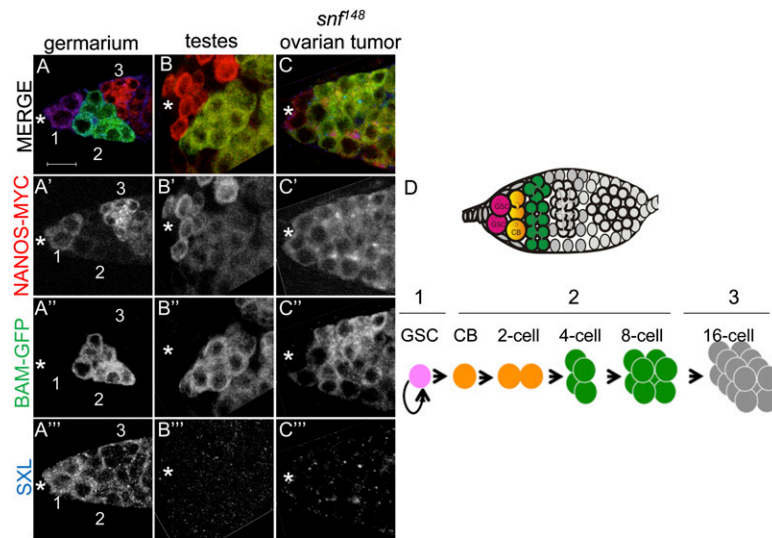

**Fig. S1.** Nanos, Bam, and Sxl protein expression in ovaries, testis, and *snf*<sup>148</sup> ovarian tumors. The same confocal images as in Fig. 1, showing the gonads from WT animals and tumorous ovaries from *snf*<sup>148</sup>/*Isnf*<sup>148</sup> females carrying fully functional copies of a Bam-GFP fusion protein and a Nanos-Myc fusion protein costained for GFP, MYC, and Sxl. (A) In the ovary, Bam and Nanos protein are expressed in nonoverlapping domains in early germ cells. Sxl is predominately expressed in the cytoplasm of both Bam- and Nanos-expressing domains. GSCs are located adjacent to the somatic cap cells, marked with an asterisk. (B) In the testis, Nanos and Bam are coexpressed in early germ cells, except for the presumptive GSCs located adjacent to the hub, marked with an asterisk. Sxl staining is not detectable in the testis. (C) In the tip of the *snf*<sup>148</sup>/*Isnf*<sup>148</sup> ovarian tumor, Nanos and Bam are coexpressed, except for the presumptive GSCs located adjacent to the somatic cap cells marked with an asterisk. No Sxl staining is detectable in the mutant germ cells, although staining is detectable in the surrounding somatic cells. Images in A–C are the same magnification. Scale bars = 10  $\mu$ m. (D) Schematic representation of wild-type germarium (Upper) and female germline stem cell lineage (Lower).

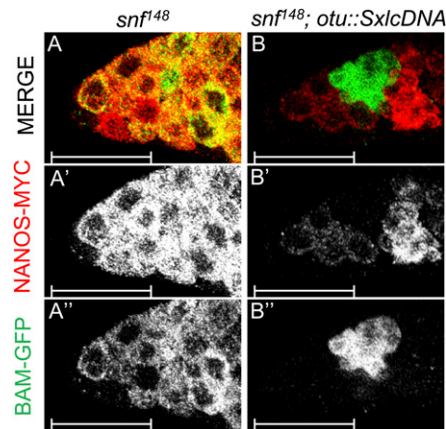

**Fig. S2.** Nanos and Bam protein expression in *snf*<sup>148</sup> ovarian tumors and rescued *snf*<sup>148</sup>; *P*{*otu*::*SxlcDNA*} ovaries. Confocal images of ovaries from animals carrying the Bam-GFP fusion protein and the Nanos-Myc<sup>WT</sup> fusion protein constructs costained for GFP and MYC. (A) In the tip of the *snf*<sup>148</sup>/*Isnf*<sup>148</sup> ovarian tumor, Bam and Nanos are coexpressed in germ cells, as in WT ovaries. Scale bars = 25  $\mu$ m. (B) In ovaries from *snf*<sup>148</sup>/*Isnf*<sup>148</sup>; *P*{*otu*::*SxlcDNA*}, Bam and Nanos protein are expressed in nonoverlapping domains, as in WT ovaries.
